# Supplementary material
Source: publisher figshare collection journal article supplement (https://acs.figshare.com/ndownloader/files/5142865)
Supplement: Supplementary file 1 [file 5142865]

## Supporting Information

Density Functional Theory (DFT) calculations were carried out to determine the Stark splitting of CO in a variety of environments. Calculations were performed with single and multiple hydrogen bonding groups and CO. In the model system comprising a single hydrogen bonding group with CO, we find that the frequencies tend to be both split and shifted. Hydrogen bonding of the type X-H...O-C tends to have a lower frequency than free CO, while X-H...C-O tends to have a higher frequency. This result is consistent with the vibrational Stark effect if we imagine the X-H dipole to substitute for an externally applied electric field. Clearly, the single-hydrogen bond model does not account for the overall shift of the C-O frequency to lower values than free CO ( $2143\text{ cm}^{-1}$ ) in different media. Polarization effects must be included that provide a model of solvation of CO. The effect of the porphyrin ring and other groups surrounding the CO molecule is likely to shift the average frequency to lower values. The significance of the calculations is that we can systematically study the different interactions, which give rise to the observed Stark splitting.

To this end, we have performed the following studies:

1. Calculation of the vibrational Stark effect on CO
2. X-H...CO and X-H...OC at the equilibrium geometry (X = CH<sub>3</sub>, C<sub>6</sub>H<sub>5</sub>, Im, OH)
3. X-H...CO and X-H...OC as a function of distance (X = CH<sub>3</sub>, C<sub>6</sub>H<sub>5</sub>, Im, OH)
4. X-H...CO...H-Y and X-H...OC...H-Y (X = CH<sub>3</sub>, Y = CH<sub>3</sub> and X = Im, Y = CH<sub>3</sub>)
5. X-H...CO and X-H...OC (X = CH<sub>3</sub>, Im) on a porphine ring

## General Considerations

The quality of the density functional theory (DFT) calculation can be gauged by determining the ground state properties of CO. In the following sections, CO will be treated as a test molecule whose frequency is altered depending on the hydrogen bonding geometry or externally applied electric field. The following ground state properties are considered here:

1. Vibrational frequency
2. Anharmonicity
3. Ground state dipole moment
4. Equilibrium bond length

Within the harmonic approximation, the calculated wavenumber of the CO stretching vibration is  $2140.4\text{ cm}^{-1}$  with an intensity of  $1.51\text{ km/mol}$ . The calculated bond length is  $d(\text{C-O}) = 1.1403\text{ \AA}$ . A potential energy surface along the C-O coordinate is plotted in Figure S1. The calculated surface is fitted to a quartic polynomial and the terms in the polynomial are used to generate the anharmonic wavefunctions and energies. For example, when corrected for  $15\text{ cm}^{-1}$  anharmonicity, the calculated wavenumber is actually  $2125.4\text{ cm}^{-1}$ . If a second polarization function is added to the basis set (38 basis functions for CO instead of 28 basis functions for DNP) the calculated frequency is  $2148.0\text{ cm}^{-1}$  and the calculated bond length is  $d(\text{C-O}) = 1.1372\text{ \AA}$ . The anharmonicity is essentially unchanged in this calculation so that the corrected wavenumber is  $2133\text{ cm}^{-1}$ . Table S1 shows a comparison of the calculated and experimental values for CO. Although the DNPP calculation has better agreement with the experiment, the DNP basis set was used consistently due to the size of constraint of the largest system studied that includes an iron porphine.

Table S1. Calculated and experimental CO stretching wavenumbers, anharmonicities, dipole moments and bond lengths for CO.

|            | $\nu_{\text{CO}} (\text{cm}^{-1})$ | $x_{\text{CO}} (\text{cm}^{-1})$ | $\mu (\text{D})$ | $d(\text{C-O}) (\text{\AA})$ |
|------------|------------------------------------|----------------------------------|------------------|------------------------------|
| DNP        | 2125                               | 15                               | -0.09            | 1.140                        |
| DNPP       | 2133                               | 15                               | -0.13            | 1.137                        |
| TN3P       | 2153                               | 15                               | -0.20            | 1.139                        |
| Experiment | 2143                               | 15                               | -0.15            | 1.129                        |

The dipole moment of CO has been used a litmus test for quantum chemical calculations for many years. It is quite small (i.e.  $-0.15$  Debye compared to  $1.85$  Debye for HF). The experimentally measured dipole moment also has an unexpected polarity, with the negative end being directed towards the carbon rather than the more electronegative element oxygen. The DFT calculation obtains the correct sign for the dipole moment. Significant improvement is observed if an additional polarization function is added (DNPP). The change in dipole moment can be compared in a calculation that includes an electric field term in the hamiltonian (Vibrational Stark effect calculation discussed below). However, the dipole moment cannot be compared in the various models since the dipole moment in a DFT calculation is calculated over the entire electron density. For example, if CO is hydrogen-bonded to water, the calculated dipole moment will be that of the system CO...H-O-H. In other words, it will be a linear combination of the CO dipole moment and the H<sub>2</sub>O dipole moment. For this reason, it is helpful to use a charge partitioning method such as the Mulliken charge or Hirschfeld charge in order to compare the effect of an applied electric field or hydrogen bonding, respectively, on the ground state electronic properties of CO.

Qualitatively similar results were obtained for both DNP and DNPP basis sets. The most complete results were obtained using the DNP basis set. The larger TN3P basis set was used as well for CO calculations without improvement of the results. However, full calculations (e.g. using a porphine model described below) were not attempted using these larger basis sets DNPP and TN3P.

### Calculation of the Vibrational Stark effect on CO

The vibrational Stark effect arises from the sum of electrical and mechanical anharmonicity effects. We have considered both of these effects and report the results to support the conclusions drawn in the manuscript. All calculations are based on the harmonic frequencies obtained using a DNP basis set and the Perdew-Wang GGA exchange functional (1) in the program DMol3 (2,3). The DNP basis set is a double- $\zeta$  quality basis set that has been shown to give reasonable agreement for vibrational frequencies (4,5). The vibrational frequencies can be corrected by using the calculated potential energy surface along the normal mode to obtain numerical wave functions using the Numerov-Cooley algorithm (6,7). In this method, both the eigenfunction and eigenvalue (corresponding to the square of the frequency) are obtained. Thus, a correction term can be determined. The potential energy surface and anharmonic wavefunctions for free CO are shown in Figure S1. The anharmonicity is approximately  $15 \text{ cm}^{-1}$  using the DNP basis set. Anharmonic corrections such as those shown in Figure S1 were calculated for the remaining species; all were within  $1 \text{ cm}^{-1}$  of  $15 \text{ cm}^{-1}$ . Thus, differences in the electrical anharmonicity are not responsible for

the observed Stark shifts. We attribute the Stark shifts due to hydrogen bonding to the so-called mechanical anharmonicity. Simply put, the C-O bond length is affected by the interaction of the dipole moment of the respective X-H group.

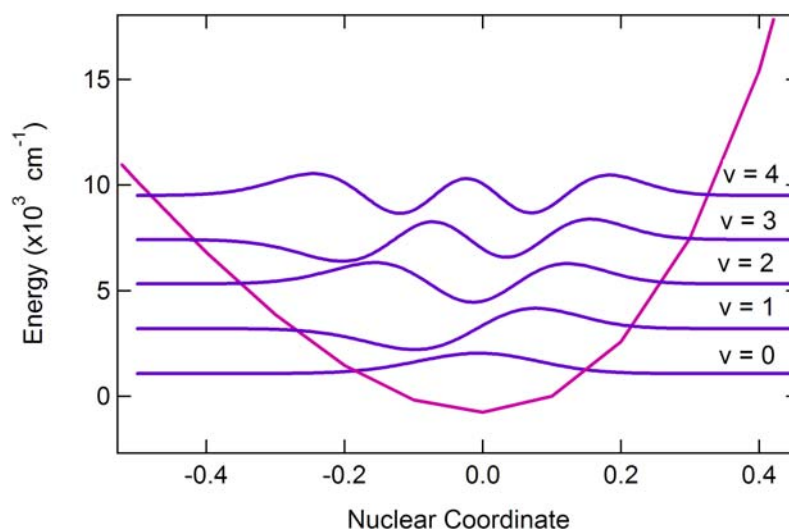

Figure S1. Calculated potential energy surface for the CO stretching vibration and the resulting anharmonic wavefunctions. Their offsets correspond to the energy eigenvalues of the anharmonic oscillator. Wavefunctions and offsets were calculated using the Numerov-Cooley algorithm.

The electrical anharmonicity of the CO oscillator was calculated using DFT methods from the vibrational frequency as a function of applied electric field ranging in field strength from  $-0.01$  to  $0.01$  in atomic units. This corresponds approximately to  $\pm 5.3 \times 10^6$  V/cm. The results are presented in Table S2.

Based on this calculation, we obtain the following correlations:

$$d (\text{\AA}) = 1.14 (\pm 0.000102) - F(\text{a.u.}) \cdot 0.33879 (\pm 0.0169) \quad (\text{S1})$$

and

$$\nu_{\text{CO}} (\text{cm}^{-1}) = 2143.9 \pm 0.948 + F(\text{a.u.}) \cdot 3180.6 \pm 156. \quad (\text{S2})$$

The correlation between the frequency (actually wavenumber) and the bond length is given in Figure S2. The correlation shown in Figure S2 is represented by the fitted line; the parameters are given in eq. S3.

$$\nu_{\text{CO}} (\text{cm}^{-1}) = 12840 (\pm 27.9) - d (\text{\AA}) \cdot 9382.8 (\pm 24.5) \quad (\text{S3})$$

Table S2. Calculated values of CO stretching wavenumber, bond length and Mulliken charge at various values of an applied electric field. The applied electric field is given in atomic units. The Mulliken charge is given for carbon [q(C)]; the one for oxygen is equal and opposite in sign.

| Field (au) | $\nu_{\text{CO}}$ ( $\text{cm}^{-1}$ ) | d(C-O) ( $\text{\AA}$ ) | q(C)  |
|------------|----------------------------------------|-------------------------|-------|
| -0.01      | 2111.3                                 | 1.1435                  | 0.145 |
| -0.009     | 2114.7                                 | 1.1431                  | 0.141 |
| -0.008     | 2118.1                                 | 1.1427                  | 0.137 |
| -0.007     | 2121.5                                 | 1.1424                  | 0.133 |
| -0.006     | 2124.8                                 | 1.1420                  | 0.128 |
| -0.005     | 2128.1                                 | 1.1416                  | 0.124 |
| -0.004     | 2131.4                                 | 1.1413                  | 0.12  |
| -0.003     | 2127.4                                 | 1.1417                  | 0.117 |
| -0.002     | 2134.6                                 | 1.1409                  | 0.112 |
| -0.001     | 2141.9                                 | 1.1401                  | 0.107 |
| 0          | 2140.4                                 | 1.1403                  | 0.104 |
| 0.001      | 2156.5                                 | 1.1386                  | 0.098 |
| 0.002      | 2163.7                                 | 1.1378                  | 0.094 |
| 0.003      | 2153.3                                 | 1.1389                  | 0.091 |
| 0.004      | 2156.2                                 | 1.1386                  | 0.086 |
| 0.005      | 2159.3                                 | 1.1383                  | 0.082 |
| 0.006      | 2162.1                                 | 1.1380                  | 0.078 |
| 0.007      | 2165                                   | 1.1377                  | 0.074 |
| 0.008      | 2167.7                                 | 1.1374                  | 0.069 |
| 0.009      | 2170.4                                 | 1.1372                  | 0.065 |
| 0.01       | 2173                                   | 1.1369                  | 0.061 |

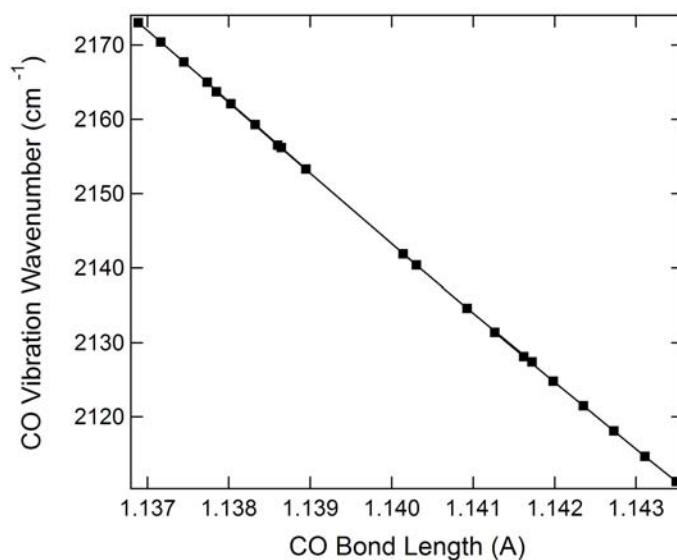

Figure S2. Correlation between CO bond length and wavenumber obtained at different electric field strengths.

### Calculations of Geometry-Optimized Hydrogen Bonded Adducts with CO

Geometry optimizations were performed for each hydrogen-bonding adduct with no constraints. The vibrational wavenumbers, C–O bond lengths and hydrogen bonding geometry are compiled in Table S3. From the calculations, we see that the Stark splitting for the two orientations (CO and OC), corresponding conceptually to two polarities of an applied electric field, depend on the chemical identity of the hydrogen bonding group. The magnitude of the splitting decreases in the sequence  $\text{H}_2\text{O} \gg \text{Im} > \text{CH}_3 > \text{C}_6\text{H}_6$ . According to this calculation, the splitting by imidazole is  $6 \text{ cm}^{-1}$  whereas that of methane is  $5 \text{ cm}^{-1}$ .

Table S3. Calculated CO stretching wavenumbers and hydrogen bonding geometries for adducts of a single hydrogen-bonding group with CO. The Mulliken charges are presented in columns 6 and 7.

| System                                      | $\nu_{\text{CO}} (\text{cm}^{-1})$ | $d(\text{C}-\text{O}) (\text{\AA})$ | $d(\text{H}\dots\text{OC}) (\text{\AA})$ | $\theta(\text{H}-\text{O}-\text{C}) (\text{\AA})$ | $q(\text{C})$ | $q(\text{O})$ |
|---------------------------------------------|------------------------------------|-------------------------------------|------------------------------------------|---------------------------------------------------|---------------|---------------|
| Im-H $\dots$ CO                             | 2151.6                             | 1.1411                              | 3.50                                     | 8.2                                               | 0.122         | -0.103        |
| Im-H $\dots$ OC                             | 2157.5                             | 1.1410                              | 3.49                                     | 7.6                                               | 0.121         | -0.103        |
| CH <sub>3</sub> -H $\dots$ CO               | 2154.9                             | 1.1403                              | 3.76                                     | 19.3                                              | 0.101         | -0.105        |
| CH <sub>3</sub> -H $\dots$ OC               | 2149.9                             | 1.1392                              | 3.84                                     | 6.7                                               | 0.094         | -0.095        |
| HO-H $\dots$ CO                             | 2168.8                             | 1.1372                              | 3.39                                     | 7.8                                               | 0.110         | -0.088        |
| HO-H $\dots$ OC                             | 2150.9                             | 1.1405                              | 3.47                                     | 3.2                                               | 0.110         | -0.106        |
| C <sub>6</sub> H <sub>5</sub> -H $\dots$ CO | 2149.4                             | 1.1403                              | 3.79                                     | 15.4                                              | 0.111         | -0.101        |
| C <sub>6</sub> H <sub>5</sub> -H $\dots$ OC | 2145.4                             | 1.1392                              | 3.77                                     | 7.5                                               | 0.098         | -0.096        |

The calculated frequency shifts in Table S3 do not agree with the calculation of the CO frequency as a function of distance presented below in Fig. S3 even at comparable distances. These calculations are not the same since the CO $\dots$ H or OC $\dots$ H bond distance was fixed in the calculations as a function of distance and these all geometric coordinates were allowed to optimize for calculations carried out in Table S3. For reasons that are not entirely clear the distances are significantly shorter ( $\sim 0.003 \text{ \AA}$ ) in the constrained calculation for the orientation OC $\dots$ H compared to the fully optimized geometry. We have not been able to explain this effect and we have used the fully optimized values for comparisons in the manuscript. The rationale is that we do not have a method for arbitrarily choosing the appropriate distance for comparison. Thus, the calculations as a function of distance are included here for completeness sake, but were not applied to the discussion in the manuscript.

### Calculations of Hydrogen-Bonded Adducts with CO as a Function of Distance

Calculations were also carried out as a function of hydrogen bonding distance between CO and X-H, with X-H = imidazole, benzene, methane and water. These results are shown in Figure S3. In these calculations, the distance between the hydrogen of X-H and the closest atom of the diatomic (either C or O depending on whether the geometry is X-H...C-O or X-H...O-C) was fixed and the remaining atoms were allowed to geometry optimize.

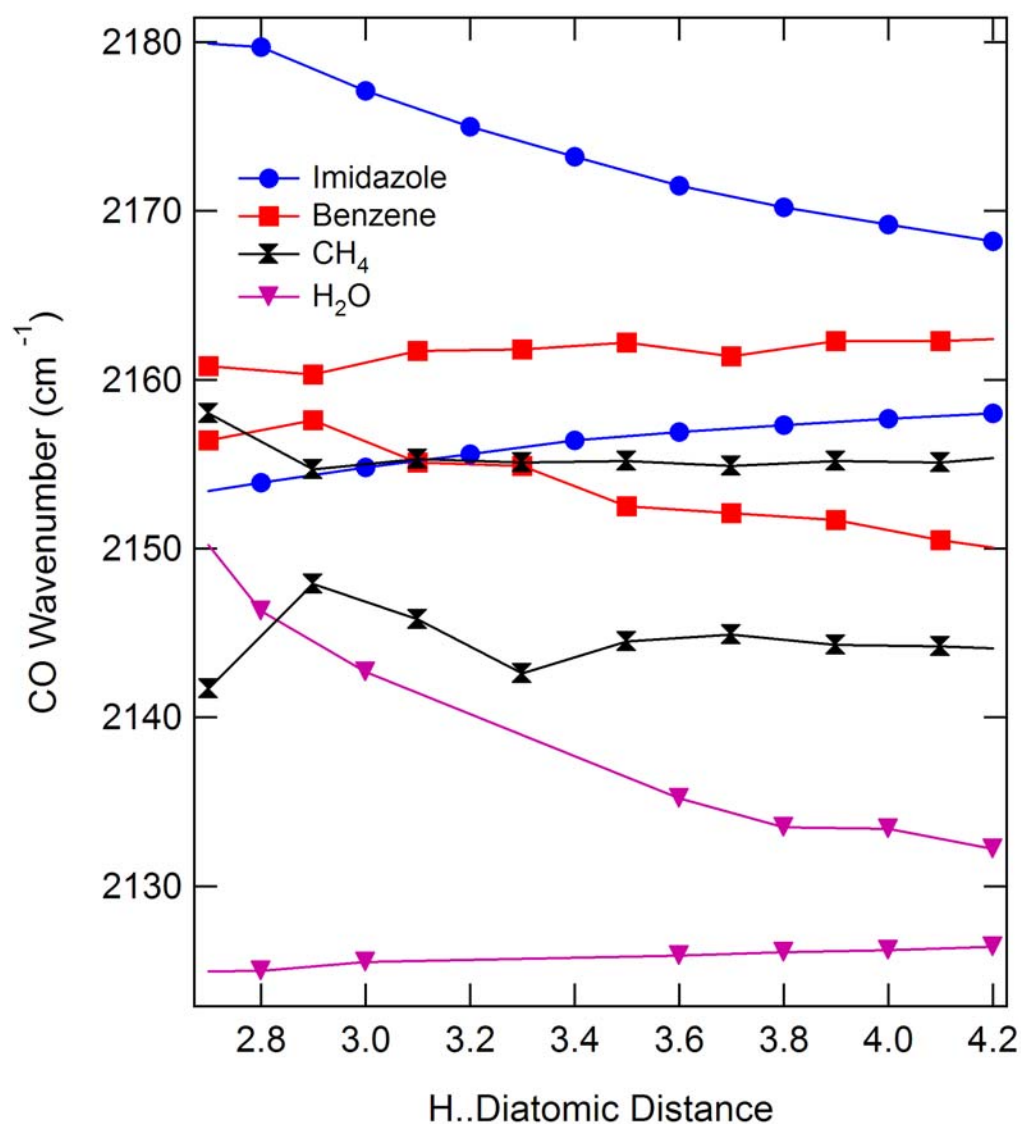

Figure S3. CO stretching frequencies for the X-H – CO and X-H – OC systems as a function of the hydrogen bonding distance (X = H<sub>2</sub>O, CH<sub>4</sub>, imidazole, benzene). The X-H – CO species always has the higher frequency.

For imidazole, the CO Stark splitting shows significant variation with hydrogen bonding distance, ranging from 28 to 10  $\text{cm}^{-1}$  (Figure S4). Similar results are obtained for  $\text{H}_2\text{O}$  hydrogen bonding to CO. On the other hand,  $\text{CH}_4$  hydrogen bonding appears to be relatively constant as a function of distance over the range studied. There is significant charge asymmetry in the CO induced by hydrogen bonding. These studies raise the issue of whether the model of a single hydrogen bond suffices for a CO molecule in an environment where multiple hydrogen bonding groups may be present.

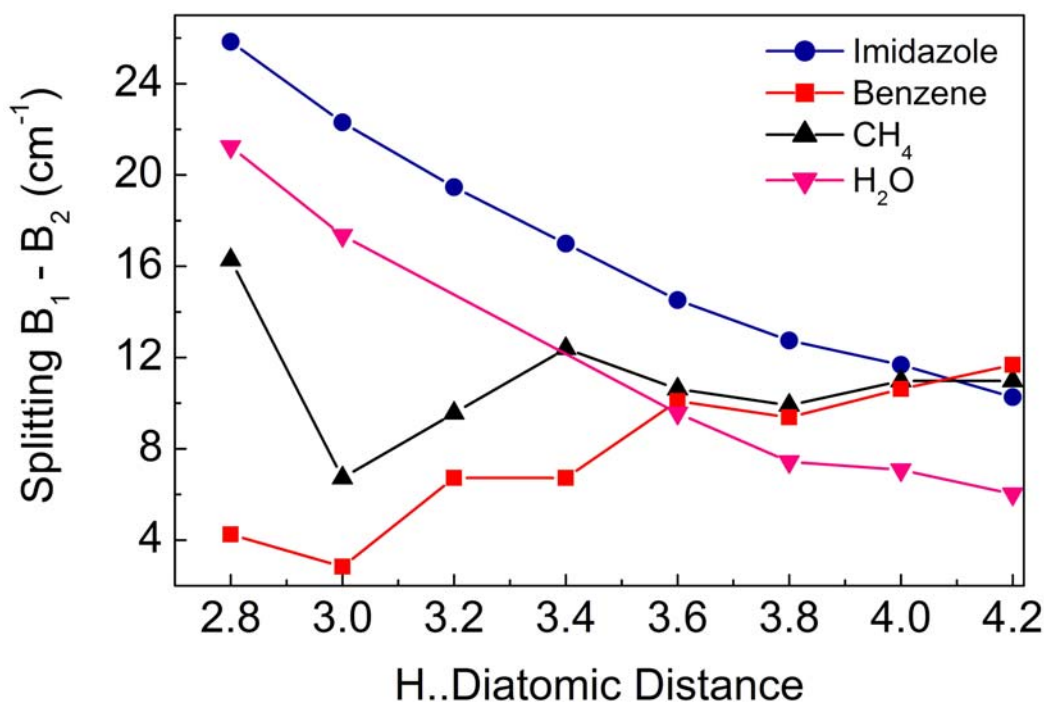

Figure S4: Splitting between the CO stretching bands  $B_1$  and  $B_2$  for all four model systems.

### Studies of Double-Hydrogen Bonded Systems

A more realistic model of the hydrogen bonding in the docking site of myoglobin might be obtained by using two hydrogen-bonding groups. The models for this calculation are presented in Table S4.

The ordering of Stark splitting is  $\text{Im} > \text{H}_2\text{O} \gg \text{C}_6\text{H}_6$ . By symmetry, there is no Stark splitting for the methane system ( $\text{CH}_3\text{-H}\dots\text{CO}\dots\text{H-CH}_3$ ). Even the double hydrogen-bonded model system presents issues that need to be resolved. First, the calculated wavenumbers are consistently higher than for free CO. This result is consistent with the bond lengths, which are shorter than that of free CO. Second, there is a significant charge asymmetry. This is an important issue because such a large charge asymmetry indicates that the intensity of the infrared absorption band will be relatively large. Typical values of the transition moment calculated using the above methods range from 80 – 110 km/mol. This is roughly 10 – 20% of the value for CO bound to iron. According to the experiment, the intensity of CO in the docking site is approximately 5% that of bound CO. The resolution to these issues is to consider the role of the porphine.

Table S4. Calculated CO stretching wavenumbers and bond lengths for adducts of two hydrogen-bonding groups with CO. The Mulliken charges  $q(\text{C})$  and  $q(\text{O})$  are also given.

| System                                                    | $\nu_{\text{CO}}$ ( $\text{cm}^{-1}$ ) | $d(\text{C}-\text{O})$ ( $\text{\AA}$ ) | $q(\text{C})$ | $q(\text{O})$ |
|-----------------------------------------------------------|----------------------------------------|-----------------------------------------|---------------|---------------|
| Im-H...CO...H-CH <sub>3</sub>                             | 2178.6                                 | 1.1382                                  | 0.138         | -0.078        |
| Im-H...OC...H-CH <sub>3</sub>                             | 2150.6                                 | 1.1409                                  | 0.134         | -0.099        |
| C <sub>6</sub> H <sub>5</sub> -H...CO...H-CH <sub>3</sub> | 2148.6                                 | 1.1392                                  | 0.119         | -0.088        |
| C <sub>6</sub> H <sub>5</sub> -H...OC...H-CH <sub>3</sub> | 2147.4                                 | 1.1388                                  | 0.124         | -0.089        |
| HO-H...CO...H-CH <sub>3</sub>                             | 2147.4                                 | 1.1404                                  | 0.126         | -0.101        |
| HO-H...OC...H-CH <sub>3</sub>                             | 2124.6                                 | 1.1401                                  | 0.128         | -0.093        |
| CH <sub>3</sub> -H...CO...H-CH <sub>3</sub>               | 2149.6                                 | 1.1392                                  | 0.120         | -0.092        |

### Model Systems that include Porphine

The models that permit comparison had a single hydrogen-bonding group with the CO placed above a porphine ring (see last two sets of model coordinates on p. S12-S16). The effect of hydrogen bonding by imidazole and methane is compared in Table S5. It is clear from the Table that the charge asymmetry is significantly reduced and that the frequency of the vibrations is lower. Moreover, the range of the observed wavenumber for the imidazole model is not extremely far from experiment.

A further test calculation was carried out for high spin iron ( $S = 2$ ). This calculation required the use of the THERMAL option for DFT. The THERMAL option allows for partial occupancy of electronic levels weighted according to the Grand Canonical Ensemble at a defined electronic temperature (corresponding to 0.02 Ha). The frequencies obtained by this method are shifted by nearly  $100 \text{ cm}^{-1}$  to lower energy compared to the  $S = 0$  calculation at the same geometry. The origin of this effect arises most likely from the more extended core size of the iron. The electrons occupy the  $d_{x^2-y^2}$  and  $d_{z^2}$  orbitals. In order to obtain a more realistic model, the iron would have to be permitted to relax out of the plane of the heme. It is well known that the geometry of the heme iron is altered by this relaxation in the deoxy form ( $S = 2$ ). However, for the present purposes, it suffices to point out that, in spite of the over  $100 \text{ cm}^{-1}$  shift in energy, the ordering of the shifts for both orientations of the CO is the same as for the  $S = 0$  calculation. In other words, the hypothesis regarding the electrostatic effect of the nitrogen as a hydrogen bonding interaction with free CO is substantiated by this calculation as well.

The N<sub>ε</sub>-tautomer of the imidazole ring of histidine was also used in model calculations, as shown in Table S5. In this tautomer, the lone pair (LP) of the imidazole is directed towards the CO rather than the hydrogen in the N-H...CO geometry considered in other models. Although the values of the frequencies are similar to those of the N<sub>δ</sub>-tautomer, the ordering of the frequencies is reversed. In other words, the isomer with the oxygen of CO closest to the lone pair (Im-LP...OC) has a lower frequency than the inverted orientation for CO (Im-LP...CO). The ordering of shifts is exactly opposite to that calculated for the hydrogen bonding models, as expected according to the vibrational Stark effect model.



Table S5. Calculated CO stretching wavenumbers and CO bond lengths for adducts of a single hydrogen-bonding group with CO on iron porphine. The Mulliken charge is presented in columns 4 and 5.

| System                   | $\nu_{\text{CO}}$ ( $\text{cm}^{-1}$ ) | d(C-O) ( $\text{\AA}$ ) | q(C)  | q(O)   | Spin (S) |
|--------------------------|----------------------------------------|-------------------------|-------|--------|----------|
| Im-H...CO                | 2023.7                                 | 1.1475                  | ---   | ---    | 2        |
| Im-H...OC                | 2019.9                                 | 1.1500                  | ---   | ---    | 2        |
| Im-LP <sup>a</sup> ...CO | 2120.0                                 | 1.1427                  | ---   | ---    | 0        |
| Im-LP <sup>a</sup> ...OC | 2132.0                                 | 1.1409                  | ---   | ---    | 0        |
| Im-H...CO                | 2129.1                                 | 1.1426                  | 0.093 | -0.104 | 0        |
| Im-H...OC                | 2122.5                                 | 1.1414                  | 0.117 | -0.117 | 0        |
| CH <sub>3</sub> -H...CO  | 2156.0                                 | 1.1409                  | 0.118 | -0.113 | 0        |
| CH <sub>3</sub> -H...OC  | 2159.8                                 | 1.1406                  | 0.104 | -0.103 | 0        |

<sup>a</sup> LP is the lone pair in the N<sub>e</sub>-tautomer that interacts with the CO.

A number of other models were tried. There is an inherent problem in the models since constrained geometry optimization must be used. The reason for this is that the CO will simply recombine with the iron if allowed to find the lowest energy structure. The calculations attempt to trap the system in a local minimum. Artificial models that place different hydrogen bonding groups on the porphine ring suffer from the disadvantage there can be electronic effects between the groups, local maxima (saddle points) and otherwise incorrect features that are not eliminated by the geometry optimization due to the constraint.

## Coordinates and Structural Data for Model Systems

The coordinates are listed for the geometry optimized structures used for the calculations of the dependence of the vibrational frequency on the hydrogen bonding geometry.

### 1. Single Hydrogen Bonding Models

#### CO...Imidazole

|     |              |              |             |     |    |   |   |       |
|-----|--------------|--------------|-------------|-----|----|---|---|-------|
| C1  | 1.239092686  | -1.643824862 | 0.000000000 | HIS | 64 | c | C | 0.000 |
| H2  | 1.569027283  | -2.677299589 | 0.000000000 | HIS | 64 | h | H | 0.000 |
| N3  | 2.141108154  | -0.603035523 | 0.000000000 | HIS | 64 | n | N | 0.000 |
| C4  | -0.053230106 | -1.167485513 | 0.000000000 | HIS | 64 | c | C | 0.000 |
| H5  | -1.017588838 | -1.658549530 | 0.000000000 | HIS | 64 | h | H | 0.000 |
| C6  | 1.410040890  | 0.495772401  | 0.000000000 | HIS | 64 | c | C | 0.000 |
| H7  | 1.787854957  | 1.512444195  | 0.000000000 | HIS | 64 | h | H | 0.000 |
| N8  | 0.070931798  | 0.207398112  | 0.000000000 | HIS | 64 | n | N | 0.000 |
| H9  | -0.692178722 | 0.875596480  | 0.000000000 | HIS | 64 | h | H | 0.000 |
| C56 | -3.762953145 | 2.534207383  | 0.000000000 | CO_ | 2  | c | C | 0.000 |
| O57 | -2.696805299 | 2.127497918  | 0.000000000 | CO_ | 2  | o | O | 0.000 |

#### CO...H<sub>2</sub>O

|    |              |              |              |     |   |   |   |       |
|----|--------------|--------------|--------------|-----|---|---|---|-------|
| H1 | 1.853975276  | -0.087870656 | 0.181783821  | WAT | 1 | h | H | 0.000 |
| O2 | 1.284775407  | -0.771775581 | -0.204575460 | WAT | 1 | o | O | 0.000 |
| H3 | 0.392199173  | -0.395216212 | -0.155602207 | WAT | 1 | h | H | 0.000 |
| C4 | -2.845579771 | 0.858215525  | -0.029164753 | CO_ | 2 | c | C | 0.000 |
| O5 | -1.765940888 | 0.490376213  | -0.026916221 | CO_ | 2 | o | O | 0.000 |

#### CO...CH<sub>4</sub>

|    |              |              |              |      |   |   |   |       |
|----|--------------|--------------|--------------|------|---|---|---|-------|
| C1 | 1.225780155  | 0.004950543  | 0.100222070  | METH | 1 | c | C | 0.000 |
| H2 | 1.585241823  | 1.039323310  | 0.126142795  | METH | 1 | h | H | 0.000 |
| H3 | 1.233159088  | -0.409831702 | 1.113962372  | METH | 1 | h | H | 0.000 |
| H4 | 1.881792919  | -0.591540715 | -0.542623550 | METH | 1 | h | H | 0.000 |
| H5 | 0.205808467  | -0.017723795 | -0.295555283 | METH | 1 | c | H | 0.000 |
| C6 | -3.629074468 | -0.007232425 | -0.165978131 | CO_  | 2 | c | C | 0.000 |
| O7 | -2.502707986 | -0.017945740 | -0.336170273 | CO_  | 2 | o | O | 0.000 |

#### CO...Benzene

|     |              |              |              |      |   |   |   |       |
|-----|--------------|--------------|--------------|------|---|---|---|-------|
| C1  | 0.063061082  | 1.194145210  | 0.058710504  | BENZ | 1 | c | C | 0.000 |
| H2  | -0.508676373 | 2.120903644  | 0.027518414  | BENZ | 1 | h | H | 0.000 |
| C3  | 1.396377865  | 1.211008684  | 0.479927081  | BENZ | 1 | c | C | 0.000 |
| H4  | 1.863063868  | 2.148591438  | 0.780415924  | BENZ | 1 | h | H | 0.000 |
| C5  | 2.130033182  | 0.021388321  | 0.519079587  | BENZ | 1 | c | C | 0.000 |
| H6  | 3.169304638  | 0.033320394  | 0.846450883  | BENZ | 1 | h | H | 0.000 |
| C7  | 1.530700140  | -1.183803006 | 0.140294272  | BENZ | 1 | c | C | 0.000 |
| H8  | 2.103484893  | -2.109791428 | 0.172898633  | BENZ | 1 | h | H | 0.000 |
| C9  | 0.197364009  | -1.200394532 | -0.280834573 | BENZ | 1 | c | C | 0.000 |
| H10 | -0.268555082 | -2.138841123 | -0.580030878 | BENZ | 1 | h | H | 0.000 |
| C11 | -0.536827779 | -0.010891031 | -0.320335892 | BENZ | 1 | c | C | 0.000 |
| H12 | -1.575885770 | -0.023071702 | -0.644478656 | BENZ | 1 | h | H | 0.000 |
| C13 | -5.343394225 | -0.031059062 | -0.504872120 | CO_  | 2 | c | C | 0.000 |
| O14 | -4.220050446 | -0.031505334 | -0.694742991 | CO_  | 2 | o | O | 0.000 |

## 2. Double Hydrogen Bonding Models

### CH<sub>4</sub>...CO...CH<sub>4</sub>

|     |              |              |              |        |   |   |       |
|-----|--------------|--------------|--------------|--------|---|---|-------|
| C1  | -3.140168861 | 1.514590013  | -1.399767311 | METH 1 | c | C | 0.000 |
| H2  | -3.213115285 | 2.545110378  | -1.043350136 | METH 1 | h | H | 0.000 |
| H3  | -2.086571457 | 1.250398645  | -1.529101644 | METH 1 | h | H | 0.000 |
| H4  | -3.610930325 | 0.845466736  | -0.673902178 | METH 1 | h | H | 0.000 |
| H5  | -3.655307852 | 1.422561668  | -2.359287475 | METH 1 | h | H | 0.000 |
| C6  | 2.842800137  | -1.754749510 | 1.799926386  | METH 2 | c | C | 0.000 |
| H7  | 3.037538724  | -1.162564537 | 2.699212353  | METH 2 | h | H | 0.000 |
| H8  | 2.034633581  | -2.463598908 | 2.000406127  | METH 2 | h | H | 0.000 |
| H9  | 3.747138918  | -2.301036006 | 1.516863753  | METH 2 | h | H | 0.000 |
| H10 | 2.550648007  | -1.089177567 | 0.985358325  | METH 2 | h | H | 0.000 |
| C11 | 0.465217754  | 0.906738662  | -1.384188401 | CO_ 3  | c | C | 0.000 |
| O12 | 1.028116658  | 0.286260426  | -0.612169798 | CO_ 3  | o | O | 0.000 |

### CH<sub>4</sub>...CO...Im

|     |              |              |              |        |   |   |       |
|-----|--------------|--------------|--------------|--------|---|---|-------|
| C1  | -3.603640939 | 3.366044401  | 2.298981777  | METH 1 | c | C | 0.000 |
| H2  | -3.682573503 | 4.399384783  | 2.646434603  | METH 1 | h | H | 0.000 |
| H3  | -2.549874956 | 3.094356700  | 2.195020665  | METH 1 | h | H | 0.000 |
| H4  | -4.085546786 | 2.700084933  | 3.020394521  | METH 1 | h | H | 0.000 |
| H5  | -4.101243569 | 3.269649427  | 1.329882486  | METH 1 | h | H | 0.000 |
| C6  | 1.997624802  | -3.310468368 | -2.020894841 | HIS 64 | c | C | 0.000 |
| H7  | 1.836059672  | -4.249224118 | -2.536761366 | HIS 64 | h | H | 0.000 |
| N8  | 3.266417914  | -2.861480468 | -1.732930458 | HIS 64 | n | N | 0.000 |
| C9  | 1.051974041  | -2.425890532 | -1.566823150 | HIS 64 | c | C | 0.000 |
| H10 | -0.028908607 | -2.422119257 | -1.599277770 | HIS 64 | h | H | 0.000 |
| C11 | 3.093756808  | -1.713376988 | -1.108233775 | HIS 64 | c | C | 0.000 |
| H12 | 3.878033633  | -1.071569551 | -0.725776495 | HIS 64 | h | H | 0.000 |
| N13 | 1.767317448  | -1.402095725 | -0.982129206 | HIS 64 | n | N | 0.000 |
| H14 | 1.375794396  | -0.576900915 | -0.545453745 | HIS 64 | h | H | 0.000 |
| C15 | -0.386047847 | 2.040391572  | 0.899454400  | CO_ 2  | c | C | 0.000 |
| O16 | 0.170857493  | 1.163214106  | 0.428112353  | CO_ 2  | o | O | 0.000 |

### Im...CO...CH<sub>4</sub>

|     |              |              |              |        |   |   |       |
|-----|--------------|--------------|--------------|--------|---|---|-------|
| C1  | -3.603640747 | 3.366004634  | 2.298790431  | METH 1 | c | C | 0.000 |
| H2  | -3.682559057 | 4.399164211  | 2.646400908  | METH 1 | h | H | 0.000 |
| H3  | -2.549897723 | 3.094614199  | 2.194909657  | METH 1 | h | H | 0.000 |
| H4  | -4.085567084 | 2.700116920  | 3.020370583  | METH 1 | h | H | 0.000 |
| H5  | -4.101239421 | 3.269813460  | 1.330236541  | METH 1 | h | H | 0.000 |
| C6  | 1.997928996  | -3.310827385 | -2.020938261 | HIS 64 | c | C | 0.000 |
| H7  | 1.836448723  | -4.249355369 | -2.536935847 | HIS 64 | h | H | 0.000 |
| N8  | 3.266761135  | -2.862324248 | -1.733220484 | HIS 64 | n | N | 0.000 |
| C9  | 1.052490178  | -2.425617634 | -1.566525057 | HIS 64 | c | C | 0.000 |
| H10 | -0.028823898 | -2.421982601 | -1.599468881 | HIS 64 | h | H | 0.000 |
| C11 | 3.092971148  | -1.713740092 | -1.108222601 | HIS 64 | c | C | 0.000 |
| H12 | 3.877964786  | -1.071540666 | -0.726159394 | HIS 64 | h | H | 0.000 |
| N13 | 1.767892856  | -1.402387523 | -0.982414469 | HIS 64 | n | N | 0.000 |
| H14 | 1.374270026  | -0.575227625 | -0.544072248 | HIS 64 | h | H | 0.000 |
| O15 | -0.384913135 | 2.038998904  | 0.899463834  | CO_ 2  | o | O | 0.000 |
| C16 | 0.169913250  | 1.164290817  | 0.427785291  | CO_ 2  | c | C | 0.000 |

Im...Porphine...CH<sub>4</sub>...CO

|      |              |              |              |     |    |    |    |       |
|------|--------------|--------------|--------------|-----|----|----|----|-------|
| C1   | 3.791516934  | 0.136178396  | 0.558642550  | HIS | 64 | c  | C  | 0.000 |
| H2   | 3.584996047  | -0.071462200 | 1.614356536  | HIS | 64 | h  | H  | 0.000 |
| H3   | 3.530848549  | -0.738539680 | -0.045965978 | HIS | 64 | h  | H  | 0.000 |
| H4   | 3.191854641  | 0.992633582  | 0.232936975  | HIS | 64 | h  | H  | 0.000 |
| H5   | 4.855924082  | 0.364181847  | 0.429827499  | HIS | 64 | h  | H  | 0.000 |
| C6   | -4.476497682 | -0.360384293 | -0.520911452 | HIS | 93 | c  | C  | 0.000 |
| H7   | -5.436258588 | -0.700273669 | -0.884976187 | HIS | 93 | h  | H  | 0.000 |
| N8   | -4.355346151 | 0.607172008  | 0.456011519  | HIS | 93 | n  | N  | 0.000 |
| H9   | -5.117404314 | 1.086439878  | 0.920686438  | HIS | 93 | h  | H  | 0.000 |
| C10  | -3.193805543 | -0.714572730 | -0.853367451 | HIS | 93 | c  | C  | 0.000 |
| H11  | -2.849722467 | -1.439574158 | -1.578428265 | HIS | 93 | h  | H  | 0.000 |
| C12  | -3.032487334 | 0.815495462  | 0.690800346  | HIS | 93 | c  | C  | 0.000 |
| H13  | -2.644494612 | 1.525256966  | 1.408519467  | HIS | 93 | h  | H  | 0.000 |
| N14  | -2.307295490 | 0.024194255  | -0.093309257 | HIS | 93 | n  | N  | 0.000 |
| FE15 | -0.361393239 | -0.035934217 | -0.145518334 | HEM | 1H | Fe | Fe | 0.000 |
| C20  | -0.290128909 | 2.364349437  | -2.589961686 | HEM | 1H | c  | C  | 0.000 |
| H21  | -0.316601158 | 3.129524401  | -3.365515504 | HEM | 1H | h  | H  | 0.000 |
| C22  | 0.093952077  | 2.387792605  | 2.238092618  | HEM | 1H | c  | C  | 0.000 |
| H23  | 0.228634438  | 3.154590739  | 2.999140553  | HEM | 1H | h  | H  | 0.000 |
| C24  | -0.253872899 | -2.444771876 | 2.283526279  | HEM | 1H | c  | C  | 0.000 |
| H25  | -0.257893143 | -3.208651897 | 3.060092545  | HEM | 1H | h  | H  | 0.000 |
| C26  | -0.318597054 | -2.481267503 | -2.557956913 | HEM | 1H | c  | C  | 0.000 |
| H27  | -0.328230366 | -3.256794710 | -3.324107677 | HEM | 1H | h  | H  | 0.000 |
| N28  | -0.143759069 | 1.963020248  | -0.169335225 | HEM | 1H | n  | N  | 0.000 |
| C29  | -0.179021522 | 2.793630659  | -1.272848790 | HEM | 1H | c  | C  | 0.000 |
| C30  | -0.045273348 | 4.172898652  | -0.874572722 | HEM | 1H | c  | C  | 0.000 |
| H31  | -0.036849007 | 5.017924276  | -1.557140144 | HEM | 1H | h  | H  | 0.000 |
| C32  | 0.082838768  | 4.180092712  | 0.484914848  | HEM | 1H | c  | C  | 0.000 |
| H33  | 0.220492976  | 5.030026037  | 1.146217809  | HEM | 1H | h  | H  | 0.000 |
| C34  | 0.015935007  | 2.804859097  | 0.914095158  | HEM | 1H | c  | C  | 0.000 |
| N35  | -0.146376464 | -0.028983869 | 1.845574363  | HEM | 1H | n  | N  | 0.000 |
| C36  | 0.027871753  | 1.067546626  | 2.669654132  | HEM | 1H | c  | C  | 0.000 |
| C37  | 0.132795534  | 0.656478201  | 4.047668640  | HEM | 1H | c  | C  | 0.000 |
| H38  | 0.300302974  | 1.329413713  | 4.882845489  | HEM | 1H | h  | H  | 0.000 |
| C39  | 0.017258743  | -0.703746032 | 4.061385320  | HEM | 1H | c  | C  | 0.000 |
| H40  | 0.071816543  | -1.377308627 | 4.911070176  | HEM | 1H | h  | H  | 0.000 |
| C41  | -0.151130342 | -1.120882055 | 2.692270439  | HEM | 1H | c  | C  | 0.000 |
| N42  | -0.291136167 | -2.047359844 | -0.139962398 | HEM | 1H | n  | N  | 0.000 |
| C43  | -0.302249534 | -2.876354442 | 0.964058497  | HEM | 1H | c  | C  | 0.000 |
| C44  | -0.333682185 | -4.261114878 | 0.561054926  | HEM | 1H | c  | C  | 0.000 |
| H45  | -0.342182378 | -5.105399940 | 1.244326765  | HEM | 1H | h  | H  | 0.000 |
| C46  | -0.334038712 | -4.273509746 | -0.803565579 | HEM | 1H | c  | C  | 0.000 |
| H47  | -0.345313033 | -5.130427771 | -1.471294693 | HEM | 1H | h  | H  | 0.000 |
| C48  | -0.309668524 | -2.894897314 | -1.230734531 | HEM | 1H | c  | C  | 0.000 |
| N49  | -0.299402326 | -0.054863023 | -2.157023726 | HEM | 1H | n  | N  | 0.000 |
| C50  | -0.313912928 | -1.158578941 | -2.988523022 | HEM | 1H | c  | C  | 0.000 |
| C51  | -0.345914152 | -0.752429546 | -4.372097125 | HEM | 1H | c  | C  | 0.000 |
| H52  | -0.344813367 | -1.433863634 | -5.218031797 | HEM | 1H | h  | H  | 0.000 |
| C53  | -0.360152680 | 0.612977406  | -4.380293603 | HEM | 1H | c  | C  | 0.000 |
| H54  | -0.373114560 | 1.282570822  | -5.235588319 | HEM | 1H | h  | H  | 0.000 |
| C55  | -0.328212792 | 1.037345190  | -3.001740739 | HEM | 1H | c  | C  | 0.000 |
| C56  | 3.179114218  | 0.101219379  | -3.903702150 | CO_ | 2  | c  | C  | 0.000 |
| O57  | 3.088233538  | 0.037438087  | -2.769227807 | CO_ | 2  | o  | O  | 0.000 |

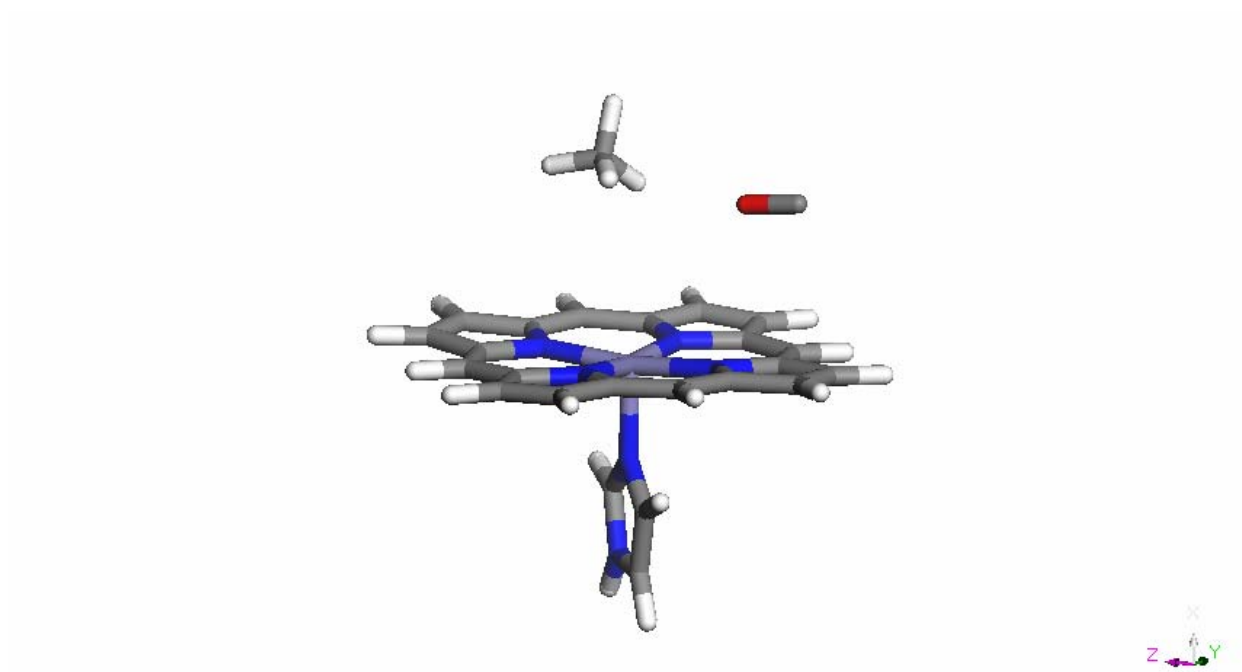

# Im...Porphine...Im...CO

|      |              |              |              |     |    |    |    |       |
|------|--------------|--------------|--------------|-----|----|----|----|-------|
| C1   | 4.787083465  | -0.154578019 | 2.479955298  | HIS | 64 | c  | C  | 0.000 |
| H2   | 5.020909541  | -0.333078818 | 3.522491194  | HIS | 64 | h  | H  | 0.000 |
| N3   | 5.777236376  | 0.110547460  | 1.559783323  | HIS | 64 | n  | N  | 0.000 |
| C4   | 3.548829470  | -0.146610476 | 1.886720284  | HIS | 64 | c  | C  | 0.000 |
| H5   | 2.546028108  | -0.302404649 | 2.261933873  | HIS | 64 | h  | H  | 0.000 |
| C6   | 5.143207949  | 0.278899667  | 0.414254651  | HIS | 64 | c  | C  | 0.000 |
| H7   | 5.601713782  | 0.504108958  | -0.540430251 | HIS | 64 | h  | H  | 0.000 |
| N8   | 3.791516934  | 0.136178396  | 0.558642550  | HIS | 64 | n  | N  | 0.000 |
| H9   | 3.085566435  | 0.223089106  | -0.186327354 | HIS | 64 | h  | H  | 0.000 |
| C10  | -4.471759808 | -0.283777122 | -0.413280013 | HIS | 93 | c  | C  | 0.000 |
| H11  | -5.450335178 | -0.610943978 | -0.730758430 | HIS | 93 | h  | H  | 0.000 |
| N12  | -4.299141925 | 0.691481146  | 0.546939351  | HIS | 93 | n  | N  | 0.000 |
| H13  | -5.033750939 | 1.184080386  | 1.035827304  | HIS | 93 | h  | H  | 0.000 |
| C14  | -3.212490879 | -0.664067654 | -0.789173640 | HIS | 93 | c  | C  | 0.000 |
| H15  | -2.899483032 | -1.401390048 | -1.514816679 | HIS | 93 | h  | H  | 0.000 |
| C16  | -2.967182662 | 0.880208347  | 0.731279931  | HIS | 93 | c  | C  | 0.000 |
| H17  | -2.533608396 | 1.585224697  | 1.426764418  | HIS | 93 | h  | H  | 0.000 |
| N18  | -2.288819038 | 0.066383584  | -0.069377532 | HIS | 93 | n  | N  | 0.000 |
| FE19 | -0.361393239 | -0.035934217 | -0.145518334 | HEM | 1H | Fe | Fe | 0.000 |
| C20  | -0.173501071 | 2.357482560  | -2.582615229 | HEM | 1H | c  | C  | 0.000 |
| H21  | -0.154565082 | 3.121775435  | -3.356792170 | HEM | 1H | h  | H  | 0.000 |
| C22  | 0.038117689  | 2.385208676  | 2.247682836  | HEM | 1H | c  | C  | 0.000 |
| H23  | 0.138375183  | 3.155141056  | 3.009426319  | HEM | 1H | h  | H  | 0.000 |
| C24  | -0.271301910 | -2.441107581 | 2.283032774  | HEM | 1H | c  | C  | 0.000 |
| H25  | -0.283264612 | -3.204416713 | 3.058422298  | HEM | 1H | h  | H  | 0.000 |
| C26  | -0.437977235 | -2.472573498 | -2.546729983 | HEM | 1H | c  | C  | 0.000 |
| H27  | -0.507262407 | -3.244282230 | -3.310834623 | HEM | 1H | h  | H  | 0.000 |
| N28  | -0.097651283 | 1.949494070  | -0.163981914 | HEM | 1H | n  | N  | 0.000 |
| C29  | -0.082901617 | 2.782083243  | -1.267385958 | HEM | 1H | c  | C  | 0.000 |
| C30  | 0.050960751  | 4.156097419  | -0.866476201 | HEM | 1H | c  | C  | 0.000 |
| H31  | 0.103728938  | 4.997017748  | -1.549042387 | HEM | 1H | h  | H  | 0.000 |

|     |              |              |              |     |    |   |   |       |
|-----|--------------|--------------|--------------|-----|----|---|---|-------|
| C32 | 0.118027589  | 4.165506868  | 0.492986186  | HEM | 1H | c | C | 0.000 |
| H33 | 0.229152228  | 5.015351717  | 1.156456526  | HEM | 1H | h | H | 0.000 |
| C34 | 0.019384596  | 2.795596886  | 0.922783314  | HEM | 1H | c | C | 0.000 |
| N35 | -0.146376464 | -0.028983869 | 1.845574363  | HEM | 1H | n | N | 0.000 |
| C36 | -0.031099454 | 1.068242051  | 2.679227791  | HEM | 1H | c | C | 0.000 |
| C37 | 0.018179204  | 0.656183933  | 4.058020799  | HEM | 1H | c | C | 0.000 |
| H38 | 0.119972992  | 1.329277613  | 4.902190764  | HEM | 1H | h | H | 0.000 |
| C39 | -0.076086607 | -0.702840442 | 4.065290060  | HEM | 1H | c | C | 0.000 |
| H40 | -0.062949982 | -1.373739755 | 4.917958791  | HEM | 1H | h | H | 0.000 |
| C41 | -0.176931059 | -1.120888939 | 2.692869558  | HEM | 1H | c | C | 0.000 |
| N42 | -0.322709970 | -2.037841255 | -0.135626197 | HEM | 1H | n | N | 0.000 |
| C43 | -0.331320492 | -2.869102544 | 0.966831319  | HEM | 1H | c | C | 0.000 |
| C44 | -0.402729477 | -4.249267999 | 0.565104980  | HEM | 1H | c | C | 0.000 |
| H45 | -0.416999953 | -5.093307871 | 1.246863504  | HEM | 1H | h | H | 0.000 |
| C46 | -0.447842566 | -4.260841527 | -0.794725524 | HEM | 1H | c | C | 0.000 |
| H47 | -0.503357185 | -5.115928054 | -1.459643153 | HEM | 1H | h | H | 0.000 |
| C48 | -0.399923717 | -2.885722880 | -1.223167809 | HEM | 1H | c | C | 0.000 |
| N49 | -0.294467198 | -0.054308542 | -2.145785855 | HEM | 1H | n | N | 0.000 |
| C50 | -0.383538862 | -1.154016072 | -2.977193184 | HEM | 1H | c | C | 0.000 |
| C51 | -0.408484048 | -0.745714801 | -4.357172015 | HEM | 1H | c | C | 0.000 |
| H52 | -0.468630461 | -1.422452813 | -5.202221944 | HEM | 1H | h | H | 0.000 |
| C53 | -0.336426684 | 0.615322287  | -4.365906313 | HEM | 1H | c | C | 0.000 |
| H54 | -0.325343642 | 1.281965098  | -5.221501537 | HEM | 1H | h | H | 0.000 |
| C55 | -0.271332592 | 1.036629560  | -2.992302969 | HEM | 1H | c | C | 0.000 |
| C56 | 2.892600723  | -0.079291489 | -3.888552951 | CO_ | 2  | c | C | 0.000 |
| O57 | 3.088233538  | 0.037438087  | -2.769227807 | CO_ | 2  | o | O | 0.000 |

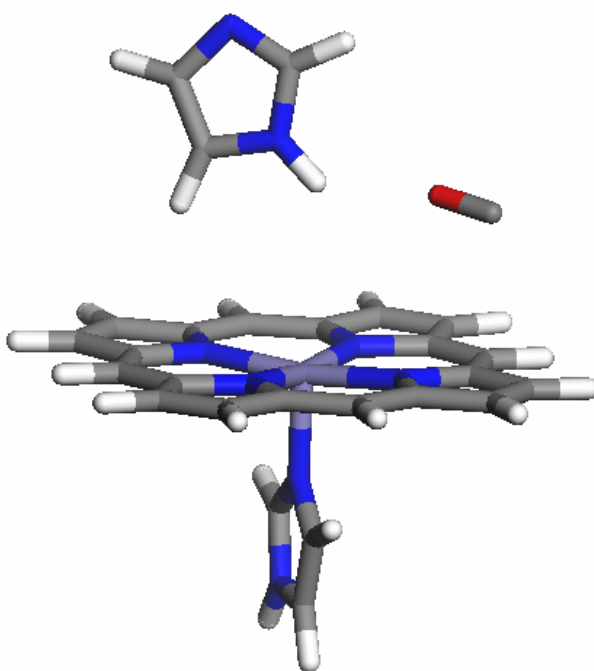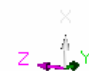

## Energy Differences

The energies of the models Im...Porphine...Im...CO are -30283.40 kJ/mol for the Im-N-H...C-O orientation and -30276.79 kJ/mol for the Im-N-H...O-C orientation. This energy difference is consistent with the calculated orientation of the CO dipole as  $C(\delta^-)O(\delta^+)$  presented in Table S1. The Lewis acid nature of the carbon end of the molecule is evident in its interaction with the hydrogen atom of the  $N_\epsilon$  atom of the imidazole ring.

## Basis Sets

The DNP basis set is comprised of the basis functions listed below.

```
Carbon      nbas= 1  z= 6.  7 radial functions,  e_ref= -0.0610950Ha
  n=1  L=0  occ= 2.00 e=    -10.008424Ha      -272.3432eV
  n=2  L=0  occ= 2.00 e=     -0.477668Ha       -12.9980eV
  n=2  L=1  occ= 2.00 e=     -0.162681Ha        -4.4268eV
  n=2  L=0  occ= 0.00 e=     -1.485015Ha       -40.4093eV
  n=2  L=1  occ= 0.00 e=     -1.169296Ha       -31.8182eV
  n=3  L=2  occ= 0.00 e=     -2.722082Ha       -74.0717eV
  n=3  L=2  occ= 0.00 e=     -1.383811Ha       -37.6554eV  eliminated
Oxygen      nbas= 2  z= 8.  7 radial functions,  e_ref= -0.0607807Ha
  n=1  L=0  occ= 2.00 e=    -18.896548Ha      -514.2014eV
  n=2  L=0  occ= 2.00 e=     -0.868840Ha       -23.6424eV
  n=2  L=1  occ= 4.00 e=     -0.322562Ha        -8.7774eV
  n=2  L=0  occ= 0.00 e=     -2.144678Ha       -58.3597eV
  n=2  L=1  occ= 0.00 e=     -1.593751Ha       -43.3682eV
  n=3  L=2  occ= 0.00 e=     -2.722082Ha       -74.0717eV
  n=3  L=2  occ= 0.00 e=     -1.383811Ha       -37.6554eV  eliminated
```

total number of valence orbitals: 28

The DNPP basis set is comprised of the basis functions listed below.

```
Carbon      nbas= 1, z= 6, nrfn= 11, rcut= 20.00, e_ref= -0.046066 Ha
  n=1  L=0  occ= 2.00 e=    -10.053949Ha      -273.5820eV
  n=2  L=0  occ= 2.00 e=     -0.506579Ha       -13.7847eV
  n=2  L=1  occ= 2.00 e=     -0.196458Ha        -5.3459eV
  n=2  L=0  occ= 0.00 e=     -1.461278Ha       -39.7634eV
  n=2  L=1  occ= 0.00 e=     -1.144604Ha       -31.1463eV
  n=3  L=2  occ= 0.00 e=     -2.000000Ha       -54.4228eV
  n=4  L=3  occ= 0.00 e=     -3.125000Ha       -85.0356eV
Oxygen      nbas= 2, z= 8, nrfn= 11, rcut= 20.00, e_ref= -0.055986 Ha
  n=1  L=0  occ= 2.00 e=    -18.913382Ha      -514.6595eV
  n=2  L=0  occ= 2.00 e=     -0.880508Ha       -23.9598eV
  n=2  L=1  occ= 4.00 e=     -0.335081Ha        -9.1180eV
  n=2  L=0  occ= 0.00 e=     -1.462710Ha       -39.8024eV
  n=2  L=1  occ= 0.00 e=     -0.906180Ha       -24.6584eV
  n=3  L=2  occ= 0.00 e=     -2.722222Ha       -74.0755eV
  n=4  L=3  occ= 0.00 e=     -4.500000Ha      -122.4513eV
```

total number of valence orbitals: 38

The TN3P basis set is comprised of the basis functions listed below.

```
Carbon      nbas= 1, z= 6, nrfn= 11, rcut= 20.00, e_ref= -0.046066 Ha
  n=1  L=0  occ= 2.00 e=    -10.053949Ha      -273.5820eV
  n=2  L=0  occ= 2.00 e=     -0.506579Ha       -13.7847eV
  n=2  L=1  occ= 2.00 e=     -0.196458Ha        -5.3459eV
```

|        |                                                           |      |      |    |              |             |
|--------|-----------------------------------------------------------|------|------|----|--------------|-------------|
| n=2    | L=0                                                       | occ= | 0.00 | e= | -1.461278Ha  | -39.7634eV  |
| n=2    | L=1                                                       | occ= | 0.00 | e= | -1.144604Ha  | -31.1463eV  |
| n=3    | L=2                                                       | occ= | 0.00 | e= | -2.000000Ha  | -54.4228eV  |
| n=4    | L=3                                                       | occ= | 0.00 | e= | -3.125000Ha  | -85.0356eV  |
| n=1    | L=0                                                       | occ= | 0.00 | e= | -12.500000Ha | -340.1425eV |
| n=2    | L=1                                                       | occ= | 0.00 | e= | -3.125000Ha  | -85.0356eV  |
| n=4    | L=2                                                       | occ= | 0.00 | e= | -1.531250Ha  | -41.6675eV  |
| n=5    | L=3                                                       | occ= | 0.00 | e= | -2.420001Ha  | -65.8516eV  |
| Oxygen | nbas= 2, z= 8, nrfn= 11, rcut= 20.00, e_ref= -0.055986 Ha |      |      |    |              |             |
| n=1    | L=0                                                       | occ= | 2.00 | e= | -18.913382Ha | -514.6595eV |
| n=2    | L=0                                                       | occ= | 2.00 | e= | -0.880508Ha  | -23.9598eV  |
| n=2    | L=1                                                       | occ= | 4.00 | e= | -0.335081Ha  | -9.1180eV   |
| n=2    | L=0                                                       | occ= | 0.00 | e= | -1.462710Ha  | -39.8024eV  |
| n=2    | L=1                                                       | occ= | 0.00 | e= | -0.906180Ha  | -24.6584eV  |
| n=3    | L=2                                                       | occ= | 0.00 | e= | -2.722222Ha  | -74.0755eV  |
| n=4    | L=3                                                       | occ= | 0.00 | e= | -4.500000Ha  | -122.4513eV |
| n=1    | L=0                                                       | occ= | 0.00 | e= | -4.500000Ha  | -122.4513eV |
| n=2    | L=1                                                       | occ= | 0.00 | e= | -1.125000Ha  | -30.6128eV  |
| n=4    | L=2                                                       | occ= | 0.00 | e= | -2.000000Ha  | -54.4228eV  |
| n=5    | L=3                                                       | occ= | 0.00 | e= | -2.880001Ha  | -78.3688eV  |

total number of valence orbitals: 74

## References

1. Perdew, J. P., Chevary, J. A., Vosko, S. H., Jackson, K. A., Pederson, M. R., Singh, D. J., and Fiolhais, C. (1992) *Phys. Rev. B* **46**, 6671-6687.
2. Delley, B. (2000) *J. Chem. Phys.* **113**, 7756-7764.
3. Delley, B. (1990) *J. Chem. Phys.* **92**, 508-517.
4. Franzen, S. (2002) *J. Phys. Chem.* **106**, 4533-4542.
5. Franzen, S. (2002) *J. Am. Chem. Soc.* **124**, 13271-13281.
6. Brewer, S. H., and Franzen, S. (2003) *J. Chem. Phys.* **119**, 851-858.
7. Franzen, S., Fritsch, K., and Brewer, S. (2002) *J. Phys. Chem. B* **106**, 11641-11646.
